# Supplementary material
Source: MDPI journal article supplement (https://www.mdpi.com/2073-4344/7/5/160)
Supplement: s1 [file s1]

## Supplementary Materials: Catalytic Behaviour of CuO-CeO<sub>2</sub> Systems Prepared by Different Synthetic Methodologies in the CO-PROX Reaction under CO<sub>2</sub>-H<sub>2</sub>O Feed Stream

Juan Antonio Cecilia, Ana Arango-Díaz, Jaasiel Marrero-Jerez, Pedro Núñez, Elisa Moretti, Loretta Storaro and Enrique Rodríguez-Castellón

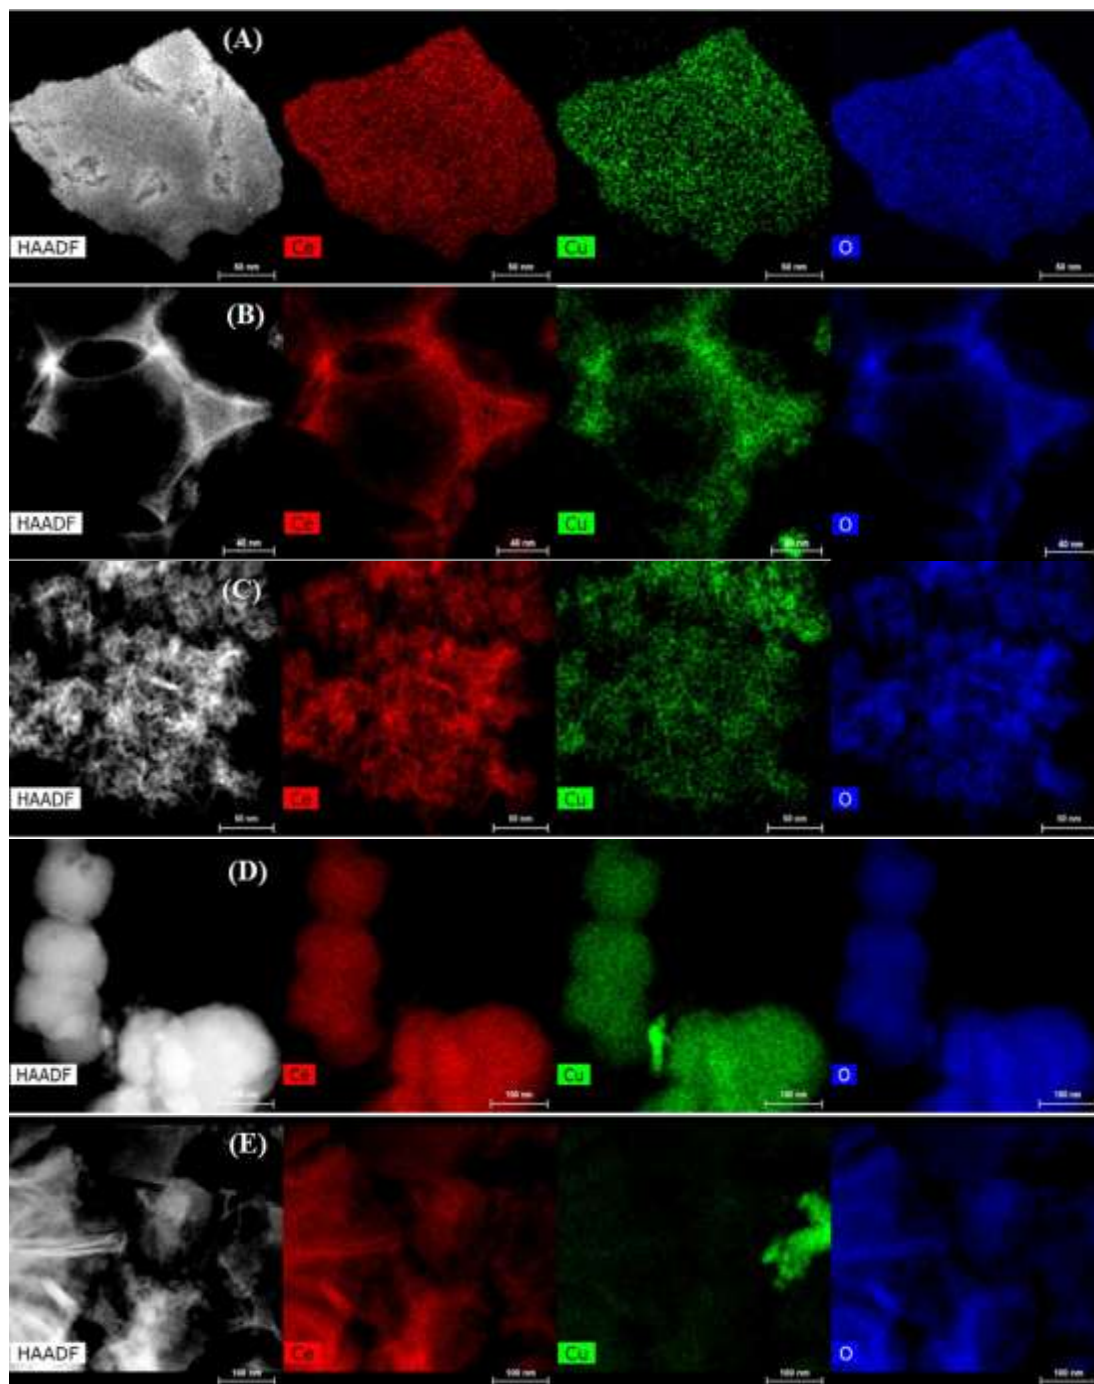

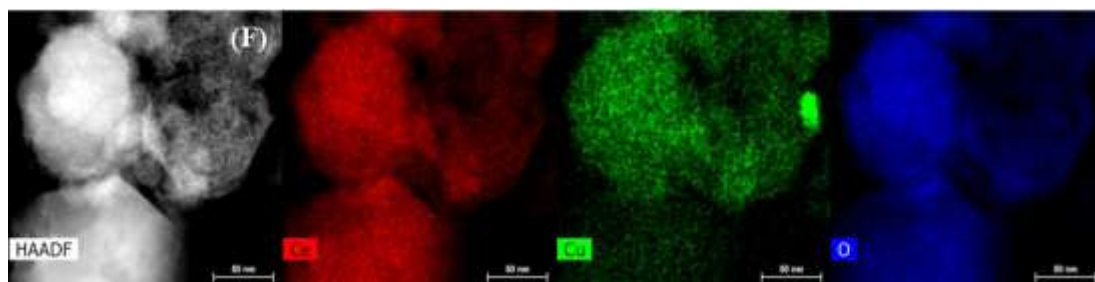

**Figure S1.** Elemental mapping obtained by EDX for (A) F-D, (B) PMMA, (C) Na-Prec, (D) U-Prec, (E) N-Calc and (F) U-Comb catalysts.
